# Supplementary material for: Optimizing the power of enzyme-based membrane-less hydrogen fuel cells for hydrogen-rich H2–air mixtures
Source: Royal Society of Chemistry journal article supplement (doi:10.1039/c3ee40791h), 2013-01-01
Supplement: c3ee40791h.pdf [file c3ee40791h.pdf]

## Supporting information

# Optimizing the Power of Enzyme-based Membrane-less Hydrogen Fuel Cells for Hydrogen-rich H<sub>2</sub>/air mixtures

Lang Xu and Fraser A. Armstrong\*

Inorganic Chemistry Laboratory, Department of Chemistry, University of Oxford, South Parks Road,  
Oxford OX1 3QR, United Kingdom

\*E-mail: [fraser.armstrong@chem.ox.ac.uk](mailto:fraser.armstrong@chem.ox.ac.uk)

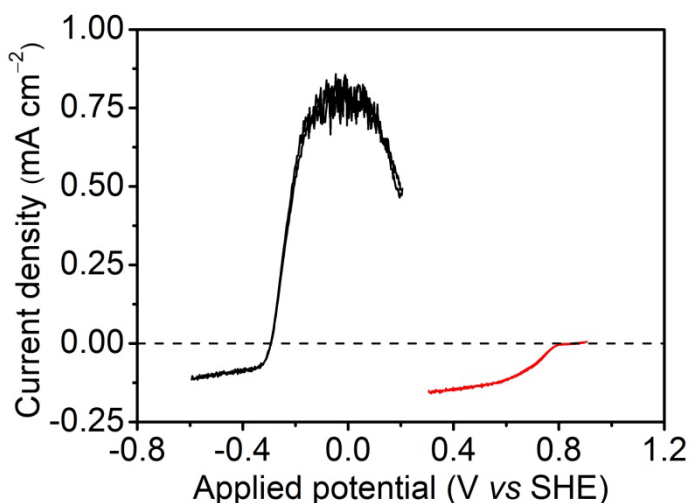

**Figure S1.** Cyclic voltammograms of the Hyd-1-modified carbon-deposited anode (black) and the BOD-modified carbon-deposited cathode (red) under a 78% H<sub>2</sub>/22% air mixture. Other conditions: temperature 25°C, scan rate: 1 mV·s<sup>-1</sup>, 0.1 M sodium phosphate buffer (pH 6.0).

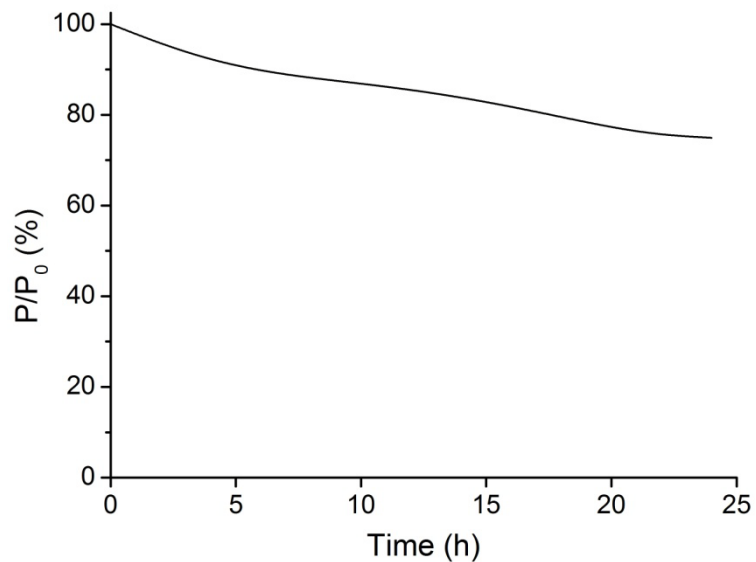

**Figure S2.** Dependence of stability of power (%) with time (h = hours) for the 1A/3C fuel cell at an applied constant potential of 0.55 V under a quiescent 78% H<sub>2</sub>/22% air mixture at 25°C in 0.1 M sodium phosphate buffer, pH 6.0.
